# Supplementary material for: Tubulin Dimers Oligomerize before Their Incorporation into Microtubules
Source: PLoS One. 2008 Nov 27;3(11):e3821. doi: 10.1371/journal.pone.0003821 (PMC2584370; doi:10.1371/journal.pone.0003821)
Supplement: Supplemental Material S1 — (0.17 MB DOC) [file pone.0003821.s001.doc]

**Supplementary material**

**FC(C)S analysis**

The measured autocorrelation curves were fitted with the standard model function for free diffusion of several components [1], yielding the diffusion correlation times where the index *i* identifies the different components. Thus, the ratio of diffusion correlation times yields the ratio of diffusion coefficients. The fit of a single component to the autocorrelation curve of free Cy5 fluorophores together with the published diffusion coefficient of Cy5, *D*Cy5 = 280 µm2 s-1 [2] in water at room temperature, served as a reference. The curves of Cy5-labeled tubulin at 500 nM concentration were fitted with two components, one assigned to free fluorophore present in the solution, the other assigned to tubulin, for which we obtained *D*tubulin = 23.4±2.2 µm2 s-1 This was then compared to the diffusion coefficient of Cy5-labeled tubulin obtained at 25 nM, *D*tubulin,free = 47.5±4.8 µm2 s-1, which was assigned to non-oligomerized tubulin dimers and which was in good agreement with the published value of *D*tubulin,free = 45 µm2 s-1 [3].

In the case of longitudinal oligomerization, the ratio of diffusion coefficients of free and oligomerized tubulin dimers, *D*tubulin,free and *D*tubulin, relates to *k*, the average number of dimers per oligomer, according to [3]:

(S1)

However, the probability of an incorporated dimer to be labeled with Cy5 is 50% and the number of Cy5-labelled dimers in an oligomer obeys a binomial distribution. Since in FCS, the contribution of a species to the resulting autocorrelation function is weighted with the square of its molecular brightness, the contribution of an oligomer containing *i* dimers is weighted with the second moment of the binomial distribution and is approximately proportional to *i*1.68 (in contrast to *i*2 for the case that all dimers carry a Cy5 label). Thus, the apparent number of dimers per oligomer as observed with FCS is

(S2)

where is the exponential probability distribution of the number of *i*-mers. Executing the integration results in a corrected number of dimers per oligomer *k*corr:

(S3)

A good observable for the amount of cross-correlation, which reflects the amount of oligomerization of differently labeled equimolar constituents, is the cross-correlation function normalized to the geometric average of the autocorrelation amplitudes [1] and more compact the normalized cross-correlation amplitude

(S4)

It represents the correlation coefficient of the signal fluctuations in the two channels, which is zero in the absence of interactions and equal to one when only double-labeled particles are present. However, cross-talk results in a baseline for non-interacting particles, which was determined using the Cy3/Cy5 mix. The cross-correlation exceeds the baseline only in the presence of complexes carrying both labels, i.e. tubulin dimers in an oligomeric state.

**Analytical calculation of oligomer size distribution**

This case is known as the isodesmic assembly and has been previously described [4]. We consider the polymerization reaction:

(S5)

The equilibrium constant is:

(S6)

The equilibrium constant is linked to *E*long, the free energy of longitudinal interaction:

(S7)

This leads to an exponential distribution for the concentration *n* of oligomers of size *i*:

(S8)

From the normalization condition, where *φ* is the total tubulin concentration,

(S9)

we can write the full expression for *n*

(S10)

From equations (S6), (S7) and (S10), we can then write *i*0 as a function of the longitudinal free energy of interaction *E*long

(S11)

**Effect of crowding on oligomer size distribution**

To generate a rough estimate of the macromolecular crowding effect on tubulin oligomerization, we used the results reported by Snoussi and Halle [5] on BPTI oligomerization in a Dextran solution. We considered the volume fraction occupied by macromolecules in the cytoplasm to be 0.2 and used figure 6 of Snoussi and Halle [5] to get an estimation of Γ, the factor relating the standard association constant with the association constant in the presence of a crowding agent. As they described the formation of decamers, we took the ninth root of the value they find for Γ. This gives us a decrease in the Elong of around 1.7 kT, leading to the formation of longer oligomers.

**References**

1. Strohner R, Wachsmuth M, Dachauer K, Mazurkiewicz J, Hochstatter J, et al. (2005) A 'loop recapture' mechanism for ACF-dependent nucleosome remodeling. Nat Struct Mol Biol 12: 683-690.

2. Bark N, Foldes-Papp Z, Rigler R (1999) The incipient stage in thrombin-induced fibrin polymerization detected by FCS at the single molecule level. Biochem Biophys Res Commun 260: 35-41.

3. Krouglova T, Vercammen J, Engelborghs Y (2004) Correct diffusion coefficients of proteins in fluorescence correlation spectroscopy. Application to tubulin oligomers induced by Mg2+ and Paclitaxel. Biophys J 87: 2635-2646.

4. Oosawa F, Asakura S (1975) Thermodynamics of the Polymerization of Proteins. New York: Academic Press.

5. Snoussi K, Halle B (2005) Protein self-association induced by macromolecular crowding: a quantitative analysis by magnetic relaxation dispersion. Biophys J 88: 2855-2866.

**Supplementary figure legends**

**Figure S1.** **EM image of GTP-Tubulin oligomers**

EM image obtained with 25 µM GTP-tubulin in BRB80. Scale bar is 100 nm.

**Figure S2. Oligomers formed by Cy3 and Cy5 labeled tubulin**

Concentration is 250 nM for each species. Scale bar is 100 nm.

**Figure S3. Logarithm of GDP-oligomers length distribution**

Fitting of the experimental results (blue points) to the model (red line).

**Figure S4. Image** **analysis of tubulin oligomers**

Left: A typical image on which image analysis was performed. Scale bar is 100 nm.

Right: The same image after image processing as described in experimental procedures.
